# Supplementary material for: The Glutathione Peroxidase Gene Family in Nitraria sibirica: Genome-Wide Identification, Classification, and Gene Expression Analysis under Stress Conditions
Source: MDPI journal article supplement (doi:10.3390/genes14040950), 2023-04-21
Supplement: s1 [file s1]

**Table S3.** Prediction of subcellular localization of NsGPX proteins

| Protein_ID | Localizations         | Signals                             | Cytoplasm | Nucleus | Extracellular | Cell membrane | Mitochondrion | Plastid | Endoplasmic reticulum | Lysosome/Vacuole | Golgi apparatus | Peroxisome |
|------------|-----------------------|-------------------------------------|-----------|---------|---------------|---------------|---------------|---------|-----------------------|------------------|-----------------|------------|
| NsGPX1     | Endoplasmic reticulum | Signal peptide Transmembrane domain | 0.3091    | 0.2121  | 0.2244        | 0.1993        | 0.1917        | 0.0873  | 0.6979                | 0.5162           | 0.6347          | 0.1366     |
| NsGPX2     | Extracellular         | Signal peptide                      | 0.3598    | 0.3233  | 0.5643        | 0.146         | 0.2196        | 0.2626  | 0.2246                | 0.2219           | 0.1586          | 0.3135     |
| NsGPX3     | Mitochondrion Plastid | Mitochondrial transit peptide       | 0.2848    | 0.2494  | 0.1079        | 0.0344        | 0.7851        | 0.7219  | 0.1356                | 0.0619           | 0.1038          | 0.1367     |
| NsGPX4     | Mitochondrion Plastid | Mitochondrial transit peptide       | 0.2747    | 0.2375  | 0.1071        | 0.0325        | 0.7903        | 0.7493  | 0.1209                | 0.0574           | 0.0967          | 0.1342     |
| NsGPX5     | Plastid               | Chloroplast transit peptide         | 0.1432    | 0.1251  | 0.0589        | 0.0587        | 0.259         | 0.9903  | 0.0682                | 0.0541           | 0.0758          | 0.1831     |
| NsGPX6     | Nucleus               | Nuclear localization signal         | 0.4126    | 0.7549  | 0.4492        | 0.1005        | 0.0414        | 0.0088  | 0.0614                | 0.0327           | 0.0333          | 0.0069     |
| NsGPX7     | Cytoplasm             |                                     | 0.5945    | 0.2957  | 0.3049        | 0.2812        | 0.4374        | 0.1226  | 0.2692                | 0.2209           | 0.2085          | 0.2358     |
