# Supplementary material for: The Glutathione Peroxidase Gene Family in Nitraria sibirica: Genome-Wide Identification, Classification, and Gene Expression Analysis under Stress Conditions
Source: MDPI journal article supplement (doi:10.3390/genes14040950), 2023-04-21
Supplement: s1 [file s1]

**Table S2.** qRT-PCR primers used to quantify *NsGPX* gene expression.

| Gene           |   | qRT-PCR Primers (5'-3')            | T <sub>m</sub> (°C) |
|----------------|---|------------------------------------|---------------------|
| <i>NsHis</i>   | F | <u>AGGAGGCGTCGAGATTGGCGAGGTA</u>   | <u>56.5</u>         |
|                | R | <u>AGGAGGCGTCGAGATTGGCGAGGTA</u>   | <u>55.67</u>        |
| <i>NsActin</i> | F | <u>TCGTGTTGCCCCTGAAGAACACCCCGT</u> | <u>58.8</u>         |
|                | R | <u>TGGATGGCGACGTACATAGCGGGCA</u>   | <u>57.3</u>         |
| <i>NsGPX1</i>  | F | TGGAAGAGGAAATGGACAGGAG             | <u>57.5</u>         |
|                | R | TGGAGTTTGGACCATCTTCGG              | <u>57.3</u>         |
| <i>NsGPX3</i>  | F | AATTTGGCGAAGAGGAGCCA               | <u>57.1</u>         |
|                | R | GCCCCATTTCCCGGACTTTA               | <u>57.9</u>         |
| <i>NsGPX4</i>  | F | AATTTGGCGAAGAGGAGCCA               | <u>57.1</u>         |
|                | R | GCCCCATTTCCCGGACTTTA               | <u>57.9</u>         |
| <i>NsGPX5</i>  | F | GTAAATGGACCAAACACTGCCC             | <u>56.7</u>         |
|                | R | GAGGAGATGTTGTTGGCGGA               | <u>57.7</u>         |
| <i>NsGPX7</i>  | F | GCCTCCAAATGCGGGTTTAC               | <u>57.3</u>         |
|                | R | GCAAAATCTTGCGCCTCCTG               | <u>57.8</u>         |
