# Supplementary material for: The Glutathione Peroxidase Gene Family in Nitraria sibirica: Genome-Wide Identification, Classification, and Gene Expression Analysis under Stress Conditions
Source: MDPI journal article supplement (doi:10.3390/genes14040950), 2023-04-21
Supplement: s1 [file s1]

**Table S4.** Kinds and numbers of known *cis*-elements in the promoter regions of *NsGPX* genes

|               | Environmental Stress |     |                          | Plant Hormones |      |    |     |     |
|---------------|----------------------|-----|--------------------------|----------------|------|----|-----|-----|
|               | MYB                  | MBS | light responsive element | SA             | MeJA | GA | ABA | Aux |
| <i>NsGPX1</i> | ✓                    | ✓   | ✓                        | ✓              | ✓    | ✓  | ✓   |     |
| <i>NsGPX2</i> | ✓                    |     |                          |                |      |    |     | ✓   |
| <i>NsGPX3</i> | ✓                    | ✓   | ✓                        | ✓              | ✓    | ✓  | ✓   |     |
| <i>NsGPX4</i> | ✓                    | ✓   | ✓                        | ✓              | ✓    | ✓  | ✓   |     |
| <i>NsGPX5</i> | ✓                    |     |                          |                | ✓    |    |     | ✓   |
| <i>NsGPX6</i> | ✓                    | ✓   | ✓                        |                |      |    |     |     |
| <i>NsGPX7</i> | ✓                    |     |                          |                |      |    |     |     |
