# Supplementary material for: The Glutathione Peroxidase Gene Family in Nitraria sibirica: Genome-Wide Identification, Classification, and Gene Expression Analysis under Stress Conditions
Source: MDPI journal article supplement (doi:10.3390/genes14040950), 2023-04-21
Supplement: s1 [file s1]

**Table S1.** The sequences of *NsGPX* genes.

| Gene          | Sequence                                                                                                                                                                                                                                                                                                                                                                                                                                                                                                                                                                                                                                                                                                                                                                                                                                                                                                                                             |
|---------------|------------------------------------------------------------------------------------------------------------------------------------------------------------------------------------------------------------------------------------------------------------------------------------------------------------------------------------------------------------------------------------------------------------------------------------------------------------------------------------------------------------------------------------------------------------------------------------------------------------------------------------------------------------------------------------------------------------------------------------------------------------------------------------------------------------------------------------------------------------------------------------------------------------------------------------------------------|
| <i>NsGPX1</i> | ATGGAAGAGGAAATGGACAGGAGTTCATTGAGGCATAGCAGCAACTGGGT<br>TTCTCTTCTTTTATTGGATTTGCTCTCTTCTTGTATTTTACAGATACC<br>CATTTTCTAATTCTTCTTCAAGTATGGCTGCCGAAGATGGTCCAACTCC<br>ATTTACGACTTCACTGTTAAGGATATCCGAGGAAATGATATTAGTCTGAA<br>GGATTACAGTGGAAAGGTCCTCTTAATTGTGAATGTCGCTTCAAAATGCG<br>GTCTAACACAATCAAACCTACAAGGAACTGAATGTCTTGTATGAGAAACAC<br>AAAGACCAAGGGTTTGAAATCTTGGCATTTCCTTGTAAACCAGTTTGCTGG<br>ACAAGAGCCGGGAAACAAGGAGGAGATTCAAGGAACTGTCTGCACAATGT<br>TTAAAGCTGAATCCCAGTTTTTGTATAAGGTTCGATGTGAATGGTAAGAAT<br>GCGGCGCCGCTCTACAAGTACCTAAAGTCACAGAAAGGAGGATTCTTAGG<br>AGATGCAATCAAGTGGAATTTACAAAGTTTTTGGTTAACAAAGAAGGGA<br>AGGTTGTCGAGAGATATTCTCCACCACGTCACCTCTTAAGATAGAGAAA<br>GATATACAGAATCTGTTGCAGTCGTCTTGA                                                                                                                                                                                                                                                 |
| <i>NsGPX2</i> | ATGGCGACCGCGATCCGACGGAGAATCAGCCTGAGGCTAACAAAAGAGAG<br>GTTGAGGAAGGTGTGGCTGAGGCAACGAAGGCGTTGGAGAGGAAAGAAAG<br>TGGAATAAGGCAGAGGCAGCCCTTGGCGAAGAAATCTGGGCTTGCGAGA<br>AGCTTGATCGGCTGGCGGAAGCGGTGACGAAGCAGGCTAGGGGCAGTCG<br>GACCAAGAGAGAGGCTTGGATGAAAAAACCTTGCTTGATTTTCGATTTG<br>GAACTGTATTTTGTGCAGGGGGAGTGGATTGACCACTTCAAATTACACT<br>GAACCTTCTCACCTATATGAGAAGTACAAGCCACAAGGATTGAAATTCT<br>GGCTTTCCTATACAATCAGTTTGGGGGGCAAGAGCTTGGAGCAAATCCAG<br>AGATCAAGCAATTTGCTTGTACCAGGTTTAAAGCAATTATAGTCCCATTT<br>CTTGTTGTTGACGTAAATGGACCAAAACACCGCCCCAGTTTACCAGTGTTT<br>GAAGTCAAATGCAGGAGGATTTTATAGGGGATTGATCAAGTGGAACCTTG<br>AGAAGTTCTTGGTTGACAAAAATGGTAAAGTTGTGGAGCGATATCCGCCA<br>ACAACATCTCCTCTCCAAATTGAGCTCACCAATCTTGGGCCGGATCCCAT<br>GGATCTCAGATTCACCATTTTTTGGGCCGGATGCTCGTTTGAGCTTAGTGG<br>GCTCTGATACCATAGGTGCAGATTTTGAAGTATTGTGAAGTTGATTGTT<br>CTCACAGCCGCTAGGGCTTGTACTACCATGGTGACACAGAAGGAGTTGTT<br>GCTTCAACAAATCATCTTGCTAAAATTTTATATTATTAATGAGTATGAGT<br>GA |
| <i>NsGPX3</i> | ATGCTCAGTTCATCAACTCGCCTTATCTTCAATCGAACTCTCAATATCAC<br>AGCTGTATCTGCTTCCGCATGTTTACCTCTAACGAAGAATTTATTTTCAG<br>ATTTTAAGAGATCGTTTTTGTATTTCCCAATCGAAGCCGCTTTCATTT<br>CTTAATTCATCTAAGAAAGCAGAGGTTCCGAAGCCAGTTTCTGCACTTT<br>GAGATCCGATCGTACCATGGCAAGCCAATCCAAGACATCAGTTCACGACT<br>TCACTGTCAAGGATGCTAGAGGAAATGATGTTGATCTTAGCATTTACAAG<br>GGGAAGCTCCTATTGATTGTCAATGTTGCTTCGCAATGTGGCCTGACCAA<br>CTCCAACCTACACAGAGCTGAGTCAATTGTATGAGAAATACAAAAGTCAAG<br>GCTTGGAGATTCTAGCATTCCTGTGTAATCAGTTTGGAGCTCAAGAACCA<br>GGAAGTAATGAGCAGATTGTAGAATTTGCTTGCCTCGCTTAAAGGCTGA<br>GTATCCCATATTTGACAAGGTTGATGTGAATGGTGACAATGCTGCTCCAA<br>TATACAAGTTCCTGAAGTCCAGCAAAGGTGGGCTCTTTGGAGACAGTATC<br>AAGTGGAAGTTCTCCAAGTTCTTGGTTCGATAAAGATGGAAATGTTGTTGA<br>ACGTTATGCCCCCTACCACATCACCTCTCAGCATCGAGGTCATGAACTTG<br>GGAAGCTGATGATCGTGCCAAAGCATTATGAAATCGAGAGAACTAGAAAT<br>GTGTTTCGGAGCGGTTTACATAGTTTTTAACTATCTAAACAACGGTTTCCG<br>TTTCTCTTCACTACTACTGGCTACCGTTGAGTGCTTCCGTCAACTGTACG    |

CTGCTCCTCCTCTTTCCTGCTATCTGCAGTTGCTTTGCTTGCCCTTCTCC  
AAGCTTGGAAGTAGCGTATTACAAGATGACAAGCCAATCCGTGACGAA  
TGCTGAATCAGTTTATGATTTACTGTCAAGGATGCCAATGGCGATGATG  
TAAATCTCAGCAAATATAGAGGGAAAGTGCTCCTCATAGTAAATGTTGCT  
TCGAAATGTGGAATGACCAACTCCAACACAGAGTTGAATCACTTATA  
CGAGAAGTACAAAGATCAAGGCTTGGAATTTCTGGCATTTCATGCAATC  
AATTTGGCGAAGAGGAGCCAGGAAGTAACGAAGAGATCAAAGAGCATGTC  
TGCACACGCTTCAAATCAGAATTTCCCATCCTTGCCAAGATTGACGTGAA  
CGGACAGGATGCTTCTCTGTTGTACAAGTTCTTAAAGTCCGGGAAATGGG  
GCATTTTTGGGGATGATATTCAGTGGAACCTTGCCAAGTTCTTGTTGAT  
AAGAATGGTCAAGCCGTTGACCGTTATTACCCTACAACCTCCCTCTTAG  
CCTCGAGCGTGACATCGAGAAGCTGCTGAGCATGTCTTGCTGA

*NsGPX4*

ATGCTTAGTTCATCAACTCGCTTATCTTCAATCGAACTCTCAATATCAC  
AGCTGTATCTGCTTCCGCATGTTTACCTCTAACGAAGAATTTATTTTCAG  
ATTCTAAGAGATCGTTTTTGATATTTCCCAATCGAAGCCGCTTTCATTT  
CTTAATTCATCTAAGAAAGCAGAGGTTCCGAAGCCAGTTTCTGCACTTT  
GAGATCCGATCGTACCATGGCAAGCCAATCCAAGACATCAGTTCACGACT  
TCACTGTCAAGGATGCTAGAGGAAATGATGTTGATCTTAGCATTTACAAG  
GGGAAGCTCCTATTGATTGTCAATGTTGCTTCGCAATGTGGCCTGACCAA  
CTCCAACACAGAGCTGAGTCAATTGTATGAGAAATACAAAAGTCAAG  
GCTTGAGATTCTAGCATTTCCCGTGTAATCAGTTTGAGCTCAAGAACCA  
GGAAGTAATGAGCAGATTGTAGAATTTGCTTGCACTCGCTTAAGGCTGA  
GTATCCCATATTTGACAAGGTTGATGTGAATGGTGACAATGCTGCTCCAA  
TATACAAGTTCCTGAAGTCCAGCAAAGGTGGGCTCTTTGGAGACAGTATC  
AAGTGGAACCTTCTCAAGTTCCTGGTCGATAAAGATGGAAATGTTGTTGA  
ACGTTATGCCCCTACCACATCACCTCTCAGCATCGAGGTCATGAACTTG  
GGAAGTTGATGATCGTGCCAAAGCATTATGAAATCGAGAGAACTAGAAAT  
GTGTTGGAGCGGTTTACATAGTTTTTAACTATCTAAACAACGTTTCCG  
TTTCTCTTCACTACTACTGGCTACCGTTGAGTGCTTCCGTCAACTGTACG  
CTGCTCCTCCTCTTTCAGCTATCTGCAGTTGCTTTGCTTGCCCTTCTCC  
AAGCTTGGAAGTAGCGTATTACAAGATGACAAGCCAATCCGTGACGAA  
TGCTGAATCAGTTTATGATTTACTGTCAAGGATGCCAATGGCGATGATG  
TAAATCTCAGCAAATATAGAGGGAAAGTGCTCCTCATAGTAAATGTTGCT  
TCGAAATGTGGAATGACCAACTCCAACACAGAGTTGAATCACTTATA  
CGAGAAGTACAAAGATCAAGGCTTGGAATTTCTGGCATTTCATGCAATC  
AATTTGGCGAAGAGGAGCCAGGACGTAACGAAGAGATCAAAGAGCATGTC  
TGCACACGCTTCAAATCAGAATTTCCCATCTTTGCCAAGATTGACGTGAA  
CGGACAGGATGCTTCTCTGTTGTACAAGTTCTTAAAGTCCGGGAAATGGG  
GCATTTTTGGGGATGATATTCAGTGGAACCTTGCCAAGTTCTTGTTGAT  
AAGAATGGGCAAGCCGTTGACCGTTATTACCCTACAACCTCCCTCTTAG  
CCTCGAGCGTGACATCGAGAAGCTGCTGAGCATGTCTTGCTGA

*NsGPX5*

ATGGTTTCGTCAGTCCCTTTTTCTGCAAATTTCTATTCACCTTTACACGC  
TTTCCACAGTCGAAAACCCATCCAGTTTCCTCCTCTTCTCGTCTTTCT  
CATGGCCTTCCATGGCTATTTTGAATCCTTCCATCAAATCCTCACTTGGG  
TTTTCTAAATCAGGTTTTTTTCAACACGGGTTGTTTTGTCAGTCTCAAT  
TTTACCTGGGTTTTTCTTCAAAGCTCGCTCCTCGGGTGTATGCCACAG  
CTGCTACTGAAAAGACCATCCATGACTACACTGTAAAGGATATTGATGGG  
AAGGATGTTCTCTTAGCAAATTTAAGGGGAAAGTTCTCTTGATTGTGAA  
TGTTGCTTCAAATGTGGATTGACCACTTCGAATTACACGGAACCTCTCTC  
ACTTATACGAGAAGTACAAGCCGCAAGGATTTGAAATTTCTGGCTTTTCCA  
TGCAATCAGTTTGGGGGGCAAGAGCCTGGAGCAAATCCAGAGATCAAGCA

ATTTGCTTGTACCAGGTTTAAAGCAGAATTTCCCATTTTCGACAAGGTTG  
 ACGTAAATGGACCAAACACTGCCCCAGTTTACCAGTATTTAAAGTCAAAT  
 GCAGGAGGATTTTTAGGGGATTTGATCAAGTGGAACTTTGAGAAGTTCTT  
 GGTTGACAAAAATGGTAAAGTTGTGGAGCGATATCCGCCAACACATCTC  
 CTCTGCAAATTGAGAAGGACATCCAGAAGCTTGTTACGGCATGA  
*NsGPX6* ATGGAAATGCCTGAGTCGAACAAAAGAGGGGCTGAGGAAGGTGTGGCTGA  
 GGCAGCGGAGGCGTCGAAGAGAAAAGATAGTGGAAC TAAGGCAGAGGCAG  
 CCCTTGCGAAGAAATCTCGATCTTTTCTTTGAATCCCAATGGATTGACC  
 ACTCCAAATTACAATGAACTTTCTCACTTATACGATAAGTACAAGCCGCA  
 AGGATTTGAAATTCTGGCTTTCCCATGCAATCAGTTTGGGGGGCAAGAGC  
 CTGGAGCAAATCTAGAGATCAAGCCATTTGCTTGTACCAAGTTTAAAGCA  
 GAATTCCCCATTTTCGACAAGTGGAACTTTGAAAAGTTCTTGTTGACAA  
 AAATGGTAAAGTTGTGGAGCGCTATCCGCCAACACATCTGCTCGCCAAA  
 TTGAGAAGGACATCCAGAAGGTTGTTGTGGCATAA  
*NsGPX7* ATGACTGATTTGGGTTTTGGCGATAATTACGAGCAGGATAGCAAGGGCAA  
 GGAAGTGGACCTCAGCATCTACAAAGGGAAGGTCTTACTCGTGGTCAACG  
 TCGCCTCCAAATGCGGGTTTACCGATTCAAATTACACGCAGTTGACTGAG  
 CTTTACAGCAAATACAAGGACAAAGGTTTTGAGGTTTTCGCATTTCCATG  
 CAACCAATTTCTAAACCAGGAGCCTGGGACGAGCCAGGAGGCGCAAGATT  
 TTGCATGTACCAGATACAAGGCTGAATATCCAGTTTTTCAAAGGTTCTGT  
 GTAAATGGTCCAAACACAGCACCCGTGTACCAATTCCTTAAAGCAAGTAA  
 ATCCACATTCTGGGGTCCAAGAATAAAGTGGAAC TTCACCAAGTTCTTGG  
 TTGATAAAGAAGGCCATGTCATCGCTCGCTATGGCACTTCCACCGCTCCA  
 TTGGCTATCGAGGTTCACTTTTGCACCATCTCTCTCTCTAACACACATAC  
 TTGTGCACGCGCACACACTTTTTCTGATGACACTTTGTTCAATTGTCTCAT  
 TGATCTCTAGTTAG

---
